# Supplementary material for: The Potential Mechanism of Zishen Yutai Pills against Threatened Abortion: An Approach Involving Network Pharmacology and Experimental Evidence
Source: Hindawi journal article supplement (doi:10.1155/2023/5797767), 2023-01-01
Supplement: f1 [file 5797767.f1.zip]

Archive with 2 entries (2 files):
- Graphical abstract .docx
- Tables S1-S4.docx
