# Supplementary material for: The Potential Mechanism of Zishen Yutai Pills against Threatened Abortion: An Approach Involving Network Pharmacology and Experimental Evidence
Source: Hindawi journal article supplement (doi:10.1155/2023/5797767), 2023-01-01
Supplement: f1 [file 5797767.f1.zip › Tables S1-S4.docx]

| Supplementary Table S1 Information on GO-BP | | | | | |
| --- | --- | --- | --- | --- | --- |
| Number | Category | Term | Count | PValue | FDR |
| 1 | GOTERM_BP_DIRECT | GO:0045429~positive regulation of nitric oxide biosynthetic process | 11 | 3.13E-18 | 3.64E-15 |
| 2 | GOTERM_BP_DIRECT | GO:0043066~negative regulation of apoptotic process | 16 | 5.36E-14 | 3.12E-11 |
| 3 | GOTERM_BP_DIRECT | GO:0001934~positive regulation of protein phosphorylation | 11 | 2.99E-13 | 1.16E-10 |
| 4 | GOTERM_BP_DIRECT | GO:0048661~positive regulation of smooth muscle cell proliferation | 9 | 1.15E-12 | 3.35E-10 |
| 5 | GOTERM_BP_DIRECT | GO:0045944~positive regulation of transcription from RNA polymerase II promoter | 19 | 1.8E-12 | 4.19E-10 |
| 6 | GOTERM_BP_DIRECT | GO:0070374~positive regulation of ERK1 and ERK2 cascade | 11 | 7.55E-12 | 1.47E-09 |
| 7 | GOTERM_BP_DIRECT | GO:0010628~positive regulation of gene expression | 12 | 1.68E-11 | 2.79E-09 |
| 8 | GOTERM_BP_DIRECT | GO:0071456~cellular response to hypoxia | 9 | 5.61E-11 | 8.16E-09 |
| 9 | GOTERM_BP_DIRECT | GO:0042493~response to drug | 12 | 8.29E-11 | 1.07E-08 |
| 10 | GOTERM_BP_DIRECT | GO:0031663~lipopolysaccharide-mediated signaling pathway | 7 | 1.07E-10 | 1.13E-08 |
| 11 | GOTERM_BP_DIRECT | GO:0046677~response to antibiotic | 7 | 1.07E-10 | 1.13E-08 |
| 12 | GOTERM_BP_DIRECT | GO:0045893~positive regulation of transcription, DNA-templated | 13 | 1.56E-09 | 1.51E-07 |
| 13 | GOTERM_BP_DIRECT | GO:0008284~positive regulation of cell proliferation | 12 | 7.47E-09 | 6.69E-07 |
| 14 | GOTERM_BP_DIRECT | GO:0001938~positive regulation of endothelial cell proliferation | 7 | 1.33E-08 | 1.1E-06 |
| 15 | GOTERM_BP_DIRECT | GO:0071260~cellular response to mechanical stimulus | 7 | 1.58E-08 | 1.22E-06 |
| 16 | GOTERM_BP_DIRECT | GO:0014066~regulation of phosphatidylinositol 3-kinase signaling | 7 | 2.8E-08 | 1.92E-06 |
| 17 | GOTERM_BP_DIRECT | GO:0038128~ERBB2 signaling pathway | 6 | 2.8E-08 | 1.92E-06 |
| 18 | GOTERM_BP_DIRECT | GO:0050731~positive regulation of peptidyl-tyrosine phosphorylation | 7 | 3.79E-08 | 2.45E-06 |
| 19 | GOTERM_BP_DIRECT | GO:0001525~angiogenesis | 9 | 4.55E-08 | 2.79E-06 |
| 20 | GOTERM_BP_DIRECT | GO:0051091~positive regulation of sequence-specific DNA binding transcription factor activity | 7 | 1.67E-07 | 9.73E-06 |
| 21 | GOTERM_BP_DIRECT | GO:0071222~cellular response to lipopolysaccharide | 7 | 2.59E-07 | 1.36E-05 |
| 22 | GOTERM_BP_DIRECT | GO:0043406~positive regulation of MAP kinase activity | 6 | 2.7E-07 | 1.36E-05 |
| 23 | GOTERM_BP_DIRECT | GO:0071407~cellular response to organic cyclic compound | 6 | 2.7E-07 | 1.36E-05 |
| 24 | GOTERM_BP_DIRECT | GO:0051090~regulation of sequence-specific DNA binding transcription factor activity | 5 | 3.37E-07 | 1.63E-05 |
| 25 | GOTERM_BP_DIRECT | GO:0043627~response to estrogen | 6 | 4.4E-07 | 1.98E-05 |
| 26 | GOTERM_BP_DIRECT | GO:0043065~positive regulation of apoptotic process | 9 | 4.42E-07 | 1.98E-05 |
| 27 | GOTERM_BP_DIRECT | GO:0018105~peptidyl-serine phosphorylation | 7 | 4.71E-07 | 2.03E-05 |
| 28 | GOTERM_BP_DIRECT | GO:0048010~vascular endothelial growth factor receptor signaling pathway | 6 | 7.37E-07 | 3.06E-05 |
| 29 | GOTERM_BP_DIRECT | GO:1900034~regulation of cellular response to heat | 6 | 9.04E-07 | 3.63E-05 |
| 30 | GOTERM_BP_DIRECT | GO:0042060~wound healing | 6 | 1.25E-06 | 4.84E-05 |
| 31 | GOTERM_BP_DIRECT | GO:0018108~peptidyl-tyrosine phosphorylation | 7 | 1.54E-06 | 5.63E-05 |
| 32 | GOTERM_BP_DIRECT | GO:0051897~positive regulation of protein kinase B signaling | 6 | 1.59E-06 | 5.63E-05 |
| 33 | GOTERM_BP_DIRECT | GO:0007165~signal transduction | 14 | 1.6E-06 | 5.63E-05 |
| 34 | GOTERM_BP_DIRECT | GO:0032355~response to estradiol | 6 | 2.37E-06 | 8.11E-05 |
| 35 | GOTERM_BP_DIRECT | GO:0000165~MAPK cascade | 8 | 2.5E-06 | 8.3E-05 |
| 36 | GOTERM_BP_DIRECT | GO:0046777~protein autophosphorylation | 7 | 3.04E-06 | 9.84E-05 |
| 37 | GOTERM_BP_DIRECT | GO:0008285~negative regulation of cell proliferation | 9 | 3.54E-06 | 0.000111 |
| 38 | GOTERM_BP_DIRECT | GO:0048015~phosphatidylinositol-mediated signaling | 6 | 5.03E-06 | 0.000153 |
| 39 | GOTERM_BP_DIRECT | GO:0000122~negative regulation of transcription from RNA polymerase II promoter | 11 | 5.2E-06 | 0.000153 |
| 40 | GOTERM_BP_DIRECT | GO:0000187~activation of MAPK activity | 6 | 5.27E-06 | 0.000153 |
| 41 | GOTERM_BP_DIRECT | GO:1904707~positive regulation of vascular smooth muscle cell proliferation | 4 | 5.59E-06 | 0.000155 |
| 42 | GOTERM_BP_DIRECT | GO:0060397~JAK-STAT cascade involved in growth hormone signaling pathway | 4 | 5.59E-06 | 0.000155 |
| 43 | GOTERM_BP_DIRECT | GO:0016032~viral process | 8 | 5.96E-06 | 0.000161 |
| 44 | GOTERM_BP_DIRECT | GO:0042542~response to hydrogen peroxide | 5 | 6.36E-06 | 0.000168 |
| 45 | GOTERM_BP_DIRECT | GO:0045727~positive regulation of translation | 5 | 7.43E-06 | 0.00019 |
| 46 | GOTERM_BP_DIRECT | GO:0030168~platelet activation | 6 | 7.5E-06 | 0.00019 |
| 47 | GOTERM_BP_DIRECT | GO:0060749~mammary gland alveolus development | 4 | 8.32E-06 | 0.000206 |
| 48 | GOTERM_BP_DIRECT | GO:0006468~protein phosphorylation | 9 | 9.96E-06 | 0.000237 |
| 49 | GOTERM_BP_DIRECT | GO:0030225~macrophage differentiation | 4 | 9.97E-06 | 0.000237 |
| 50 | GOTERM_BP_DIRECT | GO:0051726~regulation of cell cycle | 6 | 1.08E-05 | 0.000252 |
| 51 | GOTERM_BP_DIRECT | GO:0043536~positive regulation of blood vessel endothelial cell migration | 4 | 1.18E-05 | 0.00027 |
| 52 | GOTERM_BP_DIRECT | GO:0006950~response to stress | 5 | 1.31E-05 | 0.000292 |
| 53 | GOTERM_BP_DIRECT | GO:0070141~response to UV-A | 3 | 1.66E-05 | 0.000357 |
| 54 | GOTERM_BP_DIRECT | GO:0031281~positive regulation of cyclase activity | 3 | 1.66E-05 | 0.000357 |
| 55 | GOTERM_BP_DIRECT | GO:0006006~glucose metabolic process | 5 | 1.9E-05 | 0.000402 |
| 56 | GOTERM_BP_DIRECT | GO:0043154~negative regulation of cysteine-type endopeptidase activity involved in apoptotic process | 5 | 2.13E-05 | 0.000438 |
| 57 | GOTERM_BP_DIRECT | GO:0035924~cellular response to vascular endothelial growth factor stimulus | 4 | 2.15E-05 | 0.000438 |
| 58 | GOTERM_BP_DIRECT | GO:0008283~cell proliferation | 8 | 2.21E-05 | 0.000444 |
| 59 | GOTERM_BP_DIRECT | GO:0033138~positive regulation of peptidyl-serine phosphorylation | 5 | 2.26E-05 | 0.000446 |
| 60 | GOTERM_BP_DIRECT | GO:0007569~cell aging | 4 | 2.78E-05 | 0.00053 |
| 61 | GOTERM_BP_DIRECT | GO:0034612~response to tumor necrosis factor | 4 | 2.78E-05 | 0.00053 |
| 62 | GOTERM_BP_DIRECT | GO:0030324~lung development | 5 | 3.13E-05 | 0.000579 |
| 63 | GOTERM_BP_DIRECT | GO:0050999~regulation of nitric-oxide synthase activity | 4 | 3.13E-05 | 0.000579 |
| 64 | GOTERM_BP_DIRECT | GO:0032496~response to lipopolysaccharide | 6 | 4.17E-05 | 0.000759 |
| 65 | GOTERM_BP_DIRECT | GO:0006919~activation of cysteine-type endopeptidase activity involved in apoptotic process | 5 | 4.43E-05 | 0.000793 |
| 66 | GOTERM_BP_DIRECT | GO:0006915~apoptotic process | 9 | 4.76E-05 | 0.00084 |
| 67 | GOTERM_BP_DIRECT | GO:0043200~response to amino acid | 4 | 5.37E-05 | 0.000934 |
| 68 | GOTERM_BP_DIRECT | GO:0045907~positive regulation of vasoconstriction | 4 | 5.92E-05 | 0.001013 |
| 69 | GOTERM_BP_DIRECT | GO:0010742~macrophage derived foam cell differentiation | 3 | 8.25E-05 | 0.001392 |
| 70 | GOTERM_BP_DIRECT | GO:0009409~response to cold | 4 | 8.47E-05 | 0.001408 |
| 71 | GOTERM_BP_DIRECT | GO:0016310~phosphorylation | 5 | 9.18E-05 | 0.001505 |
| 72 | GOTERM_BP_DIRECT | GO:0042517~positive regulation of tyrosine phosphorylation of Stat3 protein | 4 | 9.97E-05 | 0.00159 |
| 73 | GOTERM_BP_DIRECT | GO:0018107~peptidyl-threonine phosphorylation | 4 | 9.97E-05 | 0.00159 |
| 74 | GOTERM_BP_DIRECT | GO:0045471~response to ethanol | 5 | 0.000111 | 0.001715 |
| 75 | GOTERM_BP_DIRECT | GO:0044321~response to leptin | 3 | 0.000115 | 0.001715 |
| 76 | GOTERM_BP_DIRECT | GO:0071312~cellular response to alkaloid | 3 | 0.000115 | 0.001715 |
| 77 | GOTERM_BP_DIRECT | GO:0043124~negative regulation of I-kappaB kinase/NF-kappaB signaling | 4 | 0.000116 | 0.001715 |
| 78 | GOTERM_BP_DIRECT | GO:0038083~peptidyl-tyrosine autophosphorylation | 4 | 0.000116 | 0.001715 |
| 79 | GOTERM_BP_DIRECT | GO:1901215~negative regulation of neuron death | 4 | 0.000116 | 0.001715 |
| 80 | GOTERM_BP_DIRECT | GO:0006974~cellular response to DNA damage stimulus | 6 | 0.000129 | 0.00187 |
| 81 | GOTERM_BP_DIRECT | GO:0042981~regulation of apoptotic process | 6 | 0.000144 | 0.002064 |
| 82 | GOTERM_BP_DIRECT | GO:2000641~regulation of early endosome to late endosome transport | 3 | 0.000154 | 0.002179 |
| 83 | GOTERM_BP_DIRECT | GO:0045766~positive regulation of angiogenesis | 5 | 0.000158 | 0.002212 |
| 84 | GOTERM_BP_DIRECT | GO:0071230~cellular response to amino acid stimulus | 4 | 0.000189 | 0.002616 |
| 85 | GOTERM_BP_DIRECT | GO:0009408~response to heat | 4 | 0.000201 | 0.002753 |
| 86 | GOTERM_BP_DIRECT | GO:1901796~regulation of signal transduction by p53 class mediator | 5 | 0.000211 | 0.002852 |
| 87 | GOTERM_BP_DIRECT | GO:0038096~Fc-gamma receptor signaling pathway involved in phagocytosis | 5 | 0.000231 | 0.00309 |
| 88 | GOTERM_BP_DIRECT | GO:0046902~regulation of mitochondrial membrane permeability | 3 | 0.000246 | 0.003217 |
| 89 | GOTERM_BP_DIRECT | GO:0033160~positive regulation of protein import into nucleus, translocation | 3 | 0.000246 | 0.003217 |
| 90 | GOTERM_BP_DIRECT | GO:0051092~positive regulation of NF-kappaB transcription factor activity | 5 | 0.000276 | 0.003564 |
| 91 | GOTERM_BP_DIRECT | GO:0030278~regulation of ossification | 3 | 0.0003 | 0.003798 |
| 92 | GOTERM_BP_DIRECT | GO:0045945~positive regulation of transcription from RNA polymerase III promoter | 3 | 0.0003 | 0.003798 |
| 93 | GOTERM_BP_DIRECT | GO:0031669~cellular response to nutrient levels | 3 | 0.00036 | 0.004502 |
| 94 | GOTERM_BP_DIRECT | GO:0009612~response to mechanical stimulus | 4 | 0.000371 | 0.004596 |
| 95 | GOTERM_BP_DIRECT | GO:0050679~positive regulation of epithelial cell proliferation | 4 | 0.00039 | 0.004779 |
| 96 | GOTERM_BP_DIRECT | GO:0051926~negative regulation of calcium ion transport | 3 | 0.000424 | 0.005093 |
| 97 | GOTERM_BP_DIRECT | GO:0051770~positive regulation of nitric-oxide synthase biosynthetic process | 3 | 0.000424 | 0.005093 |
| 98 | GOTERM_BP_DIRECT | GO:0051384~response to glucocorticoid | 4 | 0.000494 | 0.005865 |
| 99 | GOTERM_BP_DIRECT | GO:0051974~negative regulation of telomerase activity | 3 | 0.00057 | 0.006631 |
| 100 | GOTERM_BP_DIRECT | GO:0002042~cell migration involved in sprouting angiogenesis | 3 | 0.00057 | 0.006631 |
| 101 | GOTERM_BP_DIRECT | GO:0007265~Ras protein signal transduction | 4 | 0.000614 | 0.007073 |
| 102 | GOTERM_BP_DIRECT | GO:0007568~aging | 5 | 0.000624 | 0.007115 |
| 103 | GOTERM_BP_DIRECT | GO:0097194~execution phase of apoptosis | 3 | 0.00065 | 0.007346 |
| 104 | GOTERM_BP_DIRECT | GO:0050729~positive regulation of inflammatory response | 4 | 0.000694 | 0.007766 |
| 105 | GOTERM_BP_DIRECT | GO:0030224~monocyte differentiation | 3 | 0.000736 | 0.008003 |
| 106 | GOTERM_BP_DIRECT | GO:2000811~negative regulation of anoikis | 3 | 0.000736 | 0.008003 |
| 107 | GOTERM_BP_DIRECT | GO:0032722~positive regulation of chemokine production | 3 | 0.000736 | 0.008003 |
| 108 | GOTERM_BP_DIRECT | GO:0032869~cellular response to insulin stimulus | 4 | 0.000811 | 0.008737 |
| 109 | GOTERM_BP_DIRECT | GO:0038095~Fc-epsilon receptor signaling pathway | 5 | 0.000828 | 0.008844 |
| 110 | GOTERM_BP_DIRECT | GO:0031295~T cell costimulation | 4 | 0.000842 | 0.008907 |
| 111 | GOTERM_BP_DIRECT | GO:0030335~positive regulation of cell migration | 5 | 0.000937 | 0.009826 |
| 112 | GOTERM_BP_DIRECT | GO:0042127~regulation of cell proliferation | 5 | 0.000956 | 0.009936 |
| 113 | GOTERM_BP_DIRECT | GO:0030307~positive regulation of cell growth | 4 | 0.001044 | 0.010753 |
| 114 | GOTERM_BP_DIRECT | GO:0045892~negative regulation of transcription, DNA-templated | 7 | 0.001087 | 0.011098 |
| 115 | GOTERM_BP_DIRECT | GO:0006928~movement of cell or subcellular component | 4 | 0.001118 | 0.011311 |
| 116 | GOTERM_BP_DIRECT | GO:0042346~positive regulation of NF-kappaB import into nucleus | 3 | 0.001129 | 0.01133 |
| 117 | GOTERM_BP_DIRECT | GO:0010165~response to X-ray | 3 | 0.00124 | 0.01213 |
| 118 | GOTERM_BP_DIRECT | GO:2001243~negative regulation of intrinsic apoptotic signaling pathway | 3 | 0.00124 | 0.01213 |
| 119 | GOTERM_BP_DIRECT | GO:0031334~positive regulation of protein complex assembly | 3 | 0.00124 | 0.01213 |
| 120 | GOTERM_BP_DIRECT | GO:0046854~phosphatidylinositol phosphorylation | 4 | 0.001445 | 0.014012 |
| 121 | GOTERM_BP_DIRECT | GO:0007049~cell cycle | 5 | 0.001722 | 0.016564 |
| 122 | GOTERM_BP_DIRECT | GO:0042593~glucose homeostasis | 4 | 0.001775 | 0.016939 |
| 123 | GOTERM_BP_DIRECT | GO:0040007~growth | 3 | 0.002011 | 0.019031 |
| 124 | GOTERM_BP_DIRECT | GO:0043547~positive regulation of GTPase activity | 7 | 0.002048 | 0.019224 |
| 125 | GOTERM_BP_DIRECT | GO:0043542~endothelial cell migration | 3 | 0.002157 | 0.020084 |
| 126 | GOTERM_BP_DIRECT | GO:0006979~response to oxidative stress | 4 | 0.002265 | 0.020929 |
| 127 | GOTERM_BP_DIRECT | GO:0007281~germ cell development | 3 | 0.002307 | 0.020982 |
| 128 | GOTERM_BP_DIRECT | GO:1900740~positive regulation of protein insertion into mitochondrial membrane involved in apoptotic signaling pathway | 3 | 0.002307 | 0.020982 |
| 129 | GOTERM_BP_DIRECT | GO:0045765~regulation of angiogenesis | 3 | 0.002463 | 0.021717 |
| 130 | GOTERM_BP_DIRECT | GO:0042771~intrinsic apoptotic signaling pathway in response to DNA damage by p53 class mediator | 3 | 0.002463 | 0.021717 |
| 131 | GOTERM_BP_DIRECT | GO:0071392~cellular response to estradiol stimulus | 3 | 0.002463 | 0.021717 |
| 132 | GOTERM_BP_DIRECT | GO:0071479~cellular response to ionizing radiation | 3 | 0.002463 | 0.021717 |
| 133 | GOTERM_BP_DIRECT | GO:0042220~response to cocaine | 3 | 0.002623 | 0.022785 |
| 134 | GOTERM_BP_DIRECT | GO:0007259~JAK-STAT cascade | 3 | 0.002623 | 0.022785 |
| 135 | GOTERM_BP_DIRECT | GO:1902042~negative regulation of extrinsic apoptotic signaling pathway via death domain receptors | 3 | 0.002788 | 0.023688 |
| 136 | GOTERM_BP_DIRECT | GO:0043491~protein kinase B signaling | 3 | 0.002788 | 0.023688 |
| 137 | GOTERM_BP_DIRECT | GO:0071364~cellular response to epidermal growth factor stimulus | 3 | 0.002788 | 0.023688 |
| 138 | GOTERM_BP_DIRECT | GO:0097192~extrinsic apoptotic signaling pathway in absence of ligand | 3 | 0.002958 | 0.024949 |
| 139 | GOTERM_BP_DIRECT | GO:0050900~leukocyte migration | 4 | 0.003039 | 0.025447 |
| 140 | GOTERM_BP_DIRECT | GO:0031648~protein destabilization | 3 | 0.003132 | 0.026043 |
| 141 | GOTERM_BP_DIRECT | GO:0010507~negative regulation of autophagy | 3 | 0.003312 | 0.027339 |
| 142 | GOTERM_BP_DIRECT | GO:0045597~positive regulation of cell differentiation | 3 | 0.003496 | 0.028454 |
| 143 | GOTERM_BP_DIRECT | GO:2001240~negative regulation of extrinsic apoptotic signaling pathway in absence of ligand | 3 | 0.003496 | 0.028454 |
| 144 | GOTERM_BP_DIRECT | GO:0043524~negative regulation of neuron apoptotic process | 4 | 0.003793 | 0.030663 |
| 145 | GOTERM_BP_DIRECT | GO:0030890~positive regulation of B cell proliferation | 3 | 0.003878 | 0.031128 |
| 146 | GOTERM_BP_DIRECT | GO:0007166~cell surface receptor signaling pathway | 5 | 0.003994 | 0.031846 |
| 147 | GOTERM_BP_DIRECT | GO:0010629~negative regulation of gene expression | 4 | 0.00421 | 0.033335 |
| 148 | GOTERM_BP_DIRECT | GO:0008360~regulation of cell shape | 4 | 0.004473 | 0.034124 |
| 149 | GOTERM_BP_DIRECT | GO:0045740~positive regulation of DNA replication | 3 | 0.004485 | 0.034124 |
| 150 | GOTERM_BP_DIRECT | GO:0045599~negative regulation of fat cell differentiation | 3 | 0.004485 | 0.034124 |
| 151 | GOTERM_BP_DIRECT | GO:0001541~ovarian follicle development | 3 | 0.004485 | 0.034124 |
| 152 | GOTERM_BP_DIRECT | GO:0007566~embryo implantation | 3 | 0.004485 | 0.034124 |
| 153 | GOTERM_BP_DIRECT | GO:0097191~extrinsic apoptotic signaling pathway | 3 | 0.004485 | 0.034124 |
| 154 | GOTERM_BP_DIRECT | GO:0045785~positive regulation of cell adhesion | 3 | 0.004697 | 0.035273 |
| 155 | GOTERM_BP_DIRECT | GO:0043525~positive regulation of neuron apoptotic process | 3 | 0.004697 | 0.035273 |
| 156 | GOTERM_BP_DIRECT | GO:1902728~positive regulation of growth factor dependent skeletal muscle satellite cell proliferation | 2 | 0.004759 | 0.035507 |
| 157 | GOTERM_BP_DIRECT | GO:0006351~transcription, DNA-templated | 12 | 0.004839 | 0.035873 |
| 158 | GOTERM_BP_DIRECT | GO:0034644~cellular response to UV | 3 | 0.004913 | 0.035969 |
| 159 | GOTERM_BP_DIRECT | GO:0016241~regulation of macroautophagy | 3 | 0.004913 | 0.035969 |
| 160 | GOTERM_BP_DIRECT | GO:0032755~positive regulation of interleukin-6 production | 3 | 0.005134 | 0.037351 |
| 161 | GOTERM_BP_DIRECT | GO:0000186~activation of MAPKK activity | 3 | 0.005359 | 0.038273 |
| 162 | GOTERM_BP_DIRECT | GO:0010595~positive regulation of endothelial cell migration | 3 | 0.005359 | 0.038273 |
| 163 | GOTERM_BP_DIRECT | GO:0032729~positive regulation of interferon-gamma production | 3 | 0.005359 | 0.038273 |
| 164 | GOTERM_BP_DIRECT | GO:0008630~intrinsic apoptotic signaling pathway in response to DNA damage | 3 | 0.005589 | 0.03967 |
| 165 | GOTERM_BP_DIRECT | GO:0019233~sensory perception of pain | 3 | 0.006805 | 0.047716 |
| 166 | GOTERM_BP_DIRECT | GO:0034097~response to cytokine | 3 | 0.006805 | 0.047716 |
| 167 | GOTERM_BP_DIRECT | GO:0000189~MAPK import into nucleus | 2 | 0.00713 | 0.049106 |
| 168 | GOTERM_BP_DIRECT | GO:0051097~negative regulation of helicase activity | 2 | 0.00713 | 0.049106 |
| 169 | GOTERM_BP_DIRECT | GO:0061308~cardiac neural crest cell development involved in heart development | 2 | 0.00713 | 0.049106 |

Supplementary Table S2 Information on GO-CC

| Number | Category | Term | Count | PValue | FDR |
| --- | --- | --- | --- | --- | --- |
| 1 | GOTERM_CC_DIRECT | GO:0005634~nucleus | 30 | 2.82E-08 | 3.22E-06 |
| 2 | GOTERM_CC_DIRECT | GO:0005829~cytosol | 23 | 1.85E-07 | 6.72E-06 |
| 3 | GOTERM_CC_DIRECT | GO:0005654~nucleoplasm | 21 | 2.77E-07 | 6.72E-06 |
| 4 | GOTERM_CC_DIRECT | GO:0045121~membrane raft | 8 | 2.89E-07 | 6.72E-06 |
| 5 | GOTERM_CC_DIRECT | GO:0005901~caveola | 6 | 2.95E-07 | 6.72E-06 |
| 6 | GOTERM_CC_DIRECT | GO:0005737~cytoplasm | 28 | 3.91E-07 | 7.43E-06 |
| 7 | GOTERM_CC_DIRECT | GO:0043234~protein complex | 9 | 2.6E-06 | 4.24E-05 |
| 8 | GOTERM_CC_DIRECT | GO:0000790~nuclear chromatin | 6 | 6.16E-05 | 0.000878 |
| 9 | GOTERM_CC_DIRECT | GO:0048471~perinuclear region of cytoplasm | 8 | 0.000361 | 0.004574 |
| 10 | GOTERM_CC_DIRECT | GO:0005739~mitochondrion | 11 | 0.000467 | 0.005323 |
| 11 | GOTERM_CC_DIRECT | GO:0009986~cell surface | 7 | 0.001093 | 0.011328 |
| 12 | GOTERM_CC_DIRECT | GO:0009897~external side of plasma membrane | 5 | 0.001192 | 0.011328 |
| 13 | GOTERM_CC_DIRECT | GO:0005886~plasma membrane | 19 | 0.001409 | 0.012353 |
| 14 | GOTERM_CC_DIRECT | GO:0016020~membrane | 13 | 0.002014 | 0.016401 |
| 15 | GOTERM_CC_DIRECT | GO:0005615~extracellular space | 10 | 0.00216 | 0.016415 |
| 16 | GOTERM_CC_DIRECT | GO:0015630~microtubule cytoskeleton | 4 | 0.003351 | 0.023874 |
| 17 | GOTERM_CC_DIRECT | GO:0005576~extracellular region | 10 | 0.007086 | 0.047517 |

Supplementary Table S3 Information on GO-MF

| Number | Category | Term | Count | PValue | FDR |
| --- | --- | --- | --- | --- | --- |
| 1 | GOTERM_MF_DIRECT | GO:0042802~identical protein binding | 20 | 8.19E-16 | 1.88E-13 |
| 2 | GOTERM_MF_DIRECT | GO:0019899~enzyme binding | 15 | 1.51E-14 | 1.74E-12 |
| 3 | GOTERM_MF_DIRECT | GO:0005515~protein binding | 40 | 1.64E-10 | 1.26E-08 |
| 4 | GOTERM_MF_DIRECT | GO:0019903~protein phosphatase binding | 7 | 7.36E-09 | 4.23E-07 |
| 5 | GOTERM_MF_DIRECT | GO:0008134~transcription factor binding | 10 | 1.65E-08 | 7.58E-07 |
| 6 | GOTERM_MF_DIRECT | GO:0016301~kinase activity | 9 | 7.97E-08 | 3.05E-06 |
| 7 | GOTERM_MF_DIRECT | GO:0004713~protein tyrosine kinase activity | 7 | 6.58E-07 | 1.97E-05 |
| 8 | GOTERM_MF_DIRECT | GO:0030235~nitric-oxide synthase regulator activity | 4 | 6.85E-07 | 1.97E-05 |
| 9 | GOTERM_MF_DIRECT | GO:0004707~MAP kinase activity | 4 | 4.41E-06 | 0.000112 |
| 10 | GOTERM_MF_DIRECT | GO:0097110~scaffold protein binding | 5 | 4.88E-06 | 0.000112 |
| 11 | GOTERM_MF_DIRECT | GO:0004672~protein kinase activity | 8 | 1.89E-05 | 0.000395 |
| 12 | GOTERM_MF_DIRECT | GO:0005524~ATP binding | 14 | 2.41E-05 | 0.00045 |
| 13 | GOTERM_MF_DIRECT | GO:0019901~protein kinase binding | 8 | 2.54E-05 | 0.00045 |
| 14 | GOTERM_MF_DIRECT | GO:0004879~RNA polymerase II transcription factor activity, ligand-activated sequence-specific DNA binding | 4 | 8.34E-05 | 0.001369 |
| 15 | GOTERM_MF_DIRECT | GO:0044212~transcription regulatory region DNA binding | 6 | 0.00014 | 0.002047 |
| 16 | GOTERM_MF_DIRECT | GO:0001046~core promoter sequence-specific DNA binding | 4 | 0.000142 | 0.002047 |
| 17 | GOTERM_MF_DIRECT | GO:0005088~Ras guanyl-nucleotide exchange factor activity | 5 | 0.000155 | 0.002091 |
| 18 | GOTERM_MF_DIRECT | GO:0004674~protein serine/threonine kinase activity | 7 | 0.000237 | 0.002947 |
| 19 | GOTERM_MF_DIRECT | GO:0004716~receptor signaling protein tyrosine kinase activity | 3 | 0.000243 | 0.002947 |
| 20 | GOTERM_MF_DIRECT | GO:0003682~chromatin binding | 7 | 0.000293 | 0.003368 |
| 21 | GOTERM_MF_DIRECT | GO:0046934~phosphatidylinositol-4,5-bisphosphate 3-kinase activity | 4 | 0.000423 | 0.004634 |
| 22 | GOTERM_MF_DIRECT | GO:0002039~p53 binding | 4 | 0.000532 | 0.005557 |
| 23 | GOTERM_MF_DIRECT | GO:0005125~cytokine activity | 5 | 0.000779 | 0.007786 |
| 24 | GOTERM_MF_DIRECT | GO:0008022~protein C-terminus binding | 5 | 0.000882 | 0.008455 |
| 25 | GOTERM_MF_DIRECT | GO:0035257~nuclear hormone receptor binding | 3 | 0.001227 | 0.011291 |
| 26 | GOTERM_MF_DIRECT | GO:0051721~protein phosphatase 2A binding | 3 | 0.001851 | 0.016373 |
| 27 | GOTERM_MF_DIRECT | GO:0005178~integrin binding | 4 | 0.001955 | 0.01665 |
| 28 | GOTERM_MF_DIRECT | GO:0005164~tumor necrosis factor receptor binding | 3 | 0.002135 | 0.017534 |
| 29 | GOTERM_MF_DIRECT | GO:0004714~transmembrane receptor protein tyrosine kinase activity | 3 | 0.003647 | 0.028921 |
| 30 | GOTERM_MF_DIRECT | GO:0020037~heme binding | 4 | 0.004148 | 0.031805 |
| 31 | GOTERM_MF_DIRECT | GO:0046982~protein heterodimerization activity | 6 | 0.004614 | 0.03423 |
| 32 | GOTERM_MF_DIRECT | GO:0008083~growth factor activity | 4 | 0.006608 | 0.047494 |

Supplementary Table S4 Information on 104 pathways

| Numer | Term | Count | PValue | FDR |
| --- | --- | --- | --- | --- |
| 1 | hsa05200:Pathways in cancer | 27 | 8.52E-24 | 5.28E-22 |
| 2 | hsa05205:Proteoglycans in cancer | 22 | 7.28E-23 | 2.26E-21 |
| 3 | hsa05161:Hepatitis B | 18 | 4.15E-19 | 8.57E-18 |
| 4 | hsa05212:Pancreatic cancer | 13 | 5.50E-16 | 8.53E-15 |
| 5 | hsa04066:HIF-1 signaling pathway | 14 | 1.95E-15 | 2.41E-14 |
| 6 | hsa04668:TNF signaling pathway | 14 | 8.60E-15 | 8.62E-14 |
| 7 | hsa05219:Bladder cancer | 11 | 9.73E-15 | 8.62E-14 |
| 8 | hsa05215:Prostate cancer | 13 | 2.62E-14 | 2.03E-13 |
| 9 | hsa04151:PI3K-Akt signaling pathway | 19 | 6.20E-14 | 4.27E-13 |
| 10 | hsa04917:Prolactin signaling pathway | 12 | 8.45E-14 | 5.24E-13 |
| 11 | hsa05145:Toxoplasmosis | 13 | 4.14E-13 | 2.33E-12 |
| 12 | hsa04915:Estrogen signaling pathway | 12 | 3.74E-12 | 1.93E-11 |
| 13 | hsa04068:FoxO signaling pathway | 13 | 4.54E-12 | 2.17E-11 |
| 14 | hsa05164:Influenza A | 14 | 5.08E-12 | 2.25E-11 |
| 15 | hsa05152:Tuberculosis | 14 | 6.33E-12 | 2.52E-11 |
| 16 | hsa05142:Chagas disease (American trypanosomiasis) | 12 | 6.49E-12 | 2.52E-11 |
| 17 | hsa04620:Toll-like receptor signaling pathway | 12 | 8.03E-12 | 2.93E-11 |
| 18 | hsa04919:Thyroid hormone signaling pathway | 12 | 1.99E-11 | 6.85E-11 |
| 19 | hsa04370:VEGF signaling pathway | 10 | 3.17E-11 | 1.03E-10 |
| 20 | hsa04012:ErbB signaling pathway | 10 | 8.45E-10 | 2.62E-09 |
| 21 | hsa05210:Colorectal cancer | 9 | 1.35E-09 | 3.99E-09 |
| 22 | hsa05214:Glioma | 9 | 1.99E-09 | 5.53E-09 |
| 23 | hsa05160:Hepatitis C | 11 | 2.05E-09 | 5.53E-09 |
| 24 | hsa05218:Melanoma | 9 | 4.10E-09 | 1.02E-08 |
| 25 | hsa05140:Leishmaniasis | 9 | 4.10E-09 | 1.02E-08 |
| 26 | hsa05133:Pertussis | 9 | 6.40E-09 | 1.53E-08 |
| 27 | hsa05203:Viral carcinogenesis | 12 | 1.02E-08 | 2.33E-08 |
| 28 | hsa04510:Focal adhesion | 12 | 1.07E-08 | 2.37E-08 |
| 29 | hsa05213:Endometrial cancer | 8 | 1.19E-08 | 2.54E-08 |
| 30 | hsa04621:NOD-like receptor signaling pathway | 8 | 2.02E-08 | 4.05E-08 |
| 31 | hsa05223:Non-small cell lung cancer | 8 | 2.02E-08 | 4.05E-08 |
| 32 | hsa05206:MicroRNAs in cancer | 13 | 3.03E-08 | 5.87E-08 |
| 33 | hsa04380:Osteoclast differentiation | 10 | 3.27E-08 | 6.14E-08 |
| 34 | hsa05162:Measles | 10 | 3.73E-08 | 6.81E-08 |
| 35 | hsa05230:Central carbon metabolism in cancer | 8 | 5.25E-08 | 9.30E-08 |
| 36 | hsa04660:T cell receptor signaling pathway | 9 | 6.38E-08 | 1.10E-07 |
| 37 | hsa04630:Jak-STAT signaling pathway | 10 | 7.92E-08 | 1.33E-07 |
| 38 | hsa05220:Chronic myeloid leukemia | 8 | 1.20E-07 | 1.97E-07 |
| 39 | hsa04071:Sphingolipid signaling pathway | 9 | 2.66E-07 | 4.22E-07 |
| 40 | hsa05169:Epstein-Barr virus infection | 9 | 3.02E-07 | 4.68E-07 |
| 41 | hsa05168:Herpes simplex infection | 10 | 5.84E-07 | 8.66E-07 |
| 42 | hsa05221:Acute myeloid leukemia | 7 | 5.87E-07 | 8.66E-07 |
| 43 | hsa04912:GnRH signaling pathway | 8 | 6.12E-07 | 8.83E-07 |
| 44 | hsa04010:MAPK signaling pathway | 11 | 9.40E-07 | 1.32E-06 |
| 45 | hsa05166:HTLV-I infection | 11 | 9.75E-07 | 1.34E-06 |
| 46 | hsa04210:Apoptosis | 7 | 1.08E-06 | 1.46E-06 |
| 47 | hsa05231:Choline metabolism in cancer | 8 | 1.25E-06 | 1.65E-06 |
| 48 | hsa05321:Inflammatory bowel disease (IBD) | 7 | 1.31E-06 | 1.69E-06 |
| 49 | hsa05211:Renal cell carcinoma | 7 | 1.58E-06 | 1.99E-06 |
| 50 | hsa04015:Rap1 signaling pathway | 10 | 1.85E-06 | 2.29E-06 |
| 51 | hsa04664:Fc epsilon RI signaling pathway | 7 | 1.88E-06 | 2.29E-06 |
| 52 | hsa04931:Insulin resistance | 8 | 1.97E-06 | 2.35E-06 |
| 53 | hsa04014:Ras signaling pathway | 10 | 3.41E-06 | 3.99E-06 |
| 54 | hsa04722:Neurotrophin signaling pathway | 8 | 3.99E-06 | 4.59E-06 |
| 55 | hsa05132:Salmonella infection | 7 | 6.10E-06 | 6.88E-06 |
| 56 | hsa04930:Type II diabetes mellitus | 6 | 6.44E-06 | 7.13E-06 |
| 57 | hsa04914:Progesterone-mediated oocyte maturation | 7 | 8.03E-06 | 8.73E-06 |
| 58 | hsa04550:Signaling pathways regulating pluripotency of stem cells | 8 | 1.11E-05 | 1.19E-05 |
| 59 | hsa04150:mTOR signaling pathway | 6 | 1.65E-05 | 1.74E-05 |
| 60 | hsa04921:Oxytocin signaling pathway | 8 | 1.75E-05 | 1.80E-05 |
| 61 | hsa04932:Non-alcoholic fatty liver disease (NAFLD) | 8 | 1.82E-05 | 1.85E-05 |
| 62 | hsa05216:Thyroid cancer | 5 | 1.89E-05 | 1.89E-05 |
| 63 | hsa05120:Epithelial cell signaling in Helicobacter pylori infection | 6 | 3.36E-05 | 3.36E-05 |
| 64 | hsa04920:Adipocytokine signaling pathway | 6 | 4.16E-05 | 4.16E-05 |
| 65 | hsa04520:Adherens junction | 6 | 4.45E-05 | 4.45E-05 |
| 66 | hsa04062:Chemokine signaling pathway | 8 | 6.97E-05 | 6.97E-05 |
| 67 | hsa04611:Platelet activation | 7 | 7.94E-05 | 7.94E-05 |
| 68 | hsa05222:Small cell lung cancer | 6 | 1.06E-04 | 1.06E-04 |
| 69 | hsa05323:Rheumatoid arthritis | 6 | 1.25E-04 | 1.25E-04 |
| 70 | hsa05014:Amyotrophic lateral sclerosis (ALS) | 5 | 1.68E-04 | 1.68E-04 |
| 71 | hsa05134:Legionellosis | 5 | 2.28E-04 | 2.28E-04 |
| 72 | hsa05131:Shigellosis | 5 | 4.39E-04 | 4.39E-04 |
| 73 | hsa04115:p53 signaling pathway | 5 | 5.23E-04 | 5.23E-04 |
| 74 | hsa04650:Natural killer cell mediated cytotoxicity | 6 | 5.74E-04 | 5.74E-04 |
| 75 | hsa04662:B cell receptor signaling pathway | 5 | 5.85E-04 | 5.85E-04 |
| 76 | hsa04152:AMPK signaling pathway | 6 | 5.96E-04 | 5.96E-04 |
| 77 | hsa04024:cAMP signaling pathway | 7 | 7.78E-04 | 7.78E-04 |
| 78 | hsa04910:Insulin signaling pathway | 6 | 0.001005 | 0.001005 |
| 79 | hsa04666:Fc gamma R-mediated phagocytosis | 5 | 0.001229 | 0.001229 |
| 80 | hsa04064:NF-kappa B signaling pathway | 5 | 0.001401 | 0.001401 |
| 81 | hsa05202:Transcriptional misregulation in cancer | 6 | 0.002344 | 0.002344 |
| 82 | hsa05010:Alzheimer's disease | 6 | 0.002406 | 0.002406 |
| 83 | hsa04723:Retrograde endocannabinoid signaling | 5 | 0.002427 | 0.002427 |
| 84 | hsa05144:Malaria | 4 | 0.002592 | 0.002592 |
| 85 | hsa05146:Amoebiasis | 5 | 0.002894 | 0.002894 |
| 86 | hsa04725:Cholinergic synapse | 5 | 0.003419 | 0.003419 |
| 87 | hsa04670:Leukocyte transendothelial migration | 5 | 0.003883 | 0.003883 |
| 88 | hsa05416:Viral myocarditis | 4 | 0.003991 | 0.003991 |
| 89 | hsa04810:Regulation of actin cytoskeleton | 6 | 0.006251 | 0.006251 |
| 90 | hsa04622:RIG-I-like receptor signaling pathway | 4 | 0.007097 | 0.007097 |
| 91 | hsa04310:Wnt signaling pathway | 5 | 0.007402 | 0.007402 |
| 92 | hsa04320:Dorso-ventral axis formation | 3 | 0.010053 | 0.010053 |
| 93 | hsa04350:TGF-beta signaling pathway | 4 | 0.011699 | 0.011699 |
| 94 | hsa04540:Gap junction | 4 | 0.013266 | 0.013266 |
| 95 | hsa05143:African trypanosomiasis | 3 | 0.014804 | 0.014804 |
| 96 | hsa05332:Graft-versus-host disease | 3 | 0.014804 | 0.014804 |
| 97 | hsa05020:Prion diseases | 3 | 0.015673 | 0.015673 |
| 98 | hsa04750:Inflammatory mediator regulation of TRP channels | 4 | 0.017687 | 0.017687 |
| 99 | hsa04960:Aldosterone-regulated sodium reabsorption | 3 | 0.020338 | 0.020338 |
| 100 | hsa05016:Huntington's disease | 5 | 0.022582 | 0.022582 |
| 101 | hsa04726:Serotonergic synapse | 4 | 0.02453 | 0.02453 |
| 102 | hsa04110:Cell cycle | 4 | 0.032617 | 0.032617 |
| 103 | hsa04923:Regulation of lipolysis in adipocytes | 3 | 0.039801 | 0.039801 |
| 104 | hsa04261:Adrenergic signaling in cardiomyocytes | 4 | 0.042707 | 0.042707 |
